# Supplementary material
Source: publisher figshare collection journal article supplement (https://tandf.figshare.com/ndownloader/files/24771541)
Supplement: Supplementary file 1 [file 24771541]

## Sheet: Sheet1
Table S1. Details of foraminiferal data for each surface sample and for the downcore data from OD1507-39MC-06.
Sample name		006UW	001UW	038MC-03	013MC-07	039MC-08	009MC-05	002MC-08	002MC-02	053MC-07	045MC-05	047MC-08	023MC-05	034MC-01	036MC-07		039MC-04	039MC-06	039MC-06	039MC-06	039MC-06	039MC-06	039MC-06	039MC-06
Depth interval, cm		0-2	0-2	0-2	0-2	0-2	0-2	0-2	0-2	0-2	0-1	0-1	0-2	0-2	0-1		0-5	0-1	5 to 6	10 to 11	15 to 16	20 to 22	24 to 26	30 to 32
split		1	1	1	0.125	0.5	1	0.75	1	0.13	0.125	1	0.25	0.125	0.015625		1	1	1	1	1	1	1	1
Planktics/ml		0	0.268456	0.171429	0.457143	0.571429	1.37143	1.71429	1.72	312.402	50.1449	4.06667	9.79592	238.836	522.971		0.35	0.38961	0	0.714286	1.96429	0.819672	0	3.33333
Benthics/ml		3.625	13.6242	30.9143	70.4	42.8571	51.7143	30.8571	23.06	733.124	556.232	92.6	272.653	930.618	1905.37		8.8	15.5844	25.8824	35.3571	25	27.7049	16.9048	23.125
Calcareous/ml		1.75	6.44295	19.6286	62.6286	29.5429	47.6857	27.8857	20.84	664.835	495.362	76.3333	242.449	809.891	1795.66		4	5.06494	20.9804	21.4286	15.3571	15.7377	0.238095	5
Agglutinated/ml		1.875	7.18121	11.2857	7.77143	13.3143	4.02857	2.97143	2.22	68.2889	60.8696	16.2667	30.2041	120.727	109.714		4.8	10.5195	4.90196	13.9286	9.64286	11.9672	16.6667	18.125
%Calcareous		48.2759	47.2906	63.4935	88.961	68.9333	92.2099	90.3704	90.3729	90.6852	89.0568	82.4334	88.9222	87.0272	94.2418		45.4545	32.5	81.0606	60.6061	61.4286	56.8047	1.40845	21.6216
%Agglutinated		51.7241	52.7094	36.5065	11.039	31.0667	7.79006	9.62963	9.62706	9.31478	10.9432	17.5666	11.0778	12.9728	5.75816		54.5455	67.5	18.9394	39.3939	38.5714	43.1953	98.5915	78.3784
Live:total		0.310345	0.0636364	0.64695	0.529221	0.16	0.341436	0	0.296618	0.0571429	0.0620115	0.476602	0.330838	0.0340731	0.0834933		0.227273	0	0	0	0	0	0	0
volume, cc		16	14.9	35	35	35	35	35	50	9.8	27.6	15	9.8	27.5	35		20	7.7	5.1	5.6	5.6	6.1	4.2	4.8
#Benthics counted		58	203	1082	308	750	1810	810	1153	934	1919	1389	668	3199	1042		176	120	132	198	140	169	71	111
#Live benthics counted		18	25	700	163	120	618	0	342	54	119	662	221	109	87		40	0	0	0	0	0	0	0
Total benthics		58	220	1082	2464	1500	1810	1080	1153	7560	15352	1389	2672	25592	66688		176	120	132	198	140	169	71	111
Total live benthics		18	25	700	1304	240	618	0	342	432	952	662	884	872	5568		40	0	0	0	0	0	0	0
planktic counts
Neogloboquadrina pachyderma sin		0	3	6	2	10	47	45	83	454	169	58	24	804	271		7	3	17	4	11	5	0	16
Neogoboquadrina pachyderma dex			0				1	1	2	3	4	3	0	20	14		0	0	0
Globorotalia inflata			1						1	0
Turborotalita quinqueloba			0							0				1	1
Planktics counted		0	4	6	2	10	48	45	86	398	173	61	24	821	286		7	3		4	11	5	0	16
Total planktics		0	4	6	16	20	48	60	86	3184	1384	61	96	6568	18304		7	3	17	4	11	5	0	16
Calcareous counted		28	96	687	274	517	1669	732	1042	847	1709	1145	594	2784	982		80	39	107	120	86	96	1	24
Agglutinated counted		30	107	395	34	233	141	78	111	87	210	244	74	415	60		96	81	25	78	54	73	70	87
Total (living + dead) percentages of taxa
Calcareous taxa
Astrononion gallowayi		0	0	0	0	0	0	0.123457	0	0.535332	0.208442	0	0	0.187559	0		0	0	0	0	0	0	0	0
Bolivina arctica		0	0	0	0	0.266667	0.0552486	0.123457	0.260191	0.107066	0.0521105	0	0	0.218818	0		0	0	1.51515	0	0	0	0	0
Brizalina pseudopunctata		0	0	0	0	0	0	0	0	0	0.156331	0	0	0.0937793	0		0	0	0	0	0	0	0	0
Buccella frigida		3.44828	1.47783	0	3.24675	1.73333	0.0552486	0.37037	0.260191	0.749465	0	0	0.149701	0	0		8.52273	2.5	6.06061	6.56566	12.1429	12.426	0	7.20721
Buliminella elegantissima		1.72414	0	0.554529	0	0.8	0.441989	0.37037	0.433651	1.07066	6.87858	0.287977	2.69461	11.9725	2.11132		0	0	2.27273	1.0101	1.42857	0	0	0
Cassidulina neoteretis		0	3.94089	2.31054	15.5844	0.933333	8.61878	19.1358	17.4328	22.1627	17.1965	10.2952	13.4731	23.7574	22.4568		5.11364	0	6.81818	26.7677	3.57143	3.5503	0	1.8018
Cassidulina reniforme		0	1.47783	1.10906	12.013	0.533333	7.73481	2.09877	2.34172	7.81585	5.83637	4.67963	0.898204	2.34448	3.55086		0.568182	0	18.9394	8.08081	19.2857	8.87574	0	0.900901
Ceratobulimina arctica		3.44828	7.38916	7.02403	0	1.6	1.38122	0.617284	0.520382	0.642398	0.625326	3.16775	1.1976	0.906533	1.15163		0	0	0.757576	3.0303	0	1.18343	0	3.6036
Chilostomella elongata		0	0	0.0924214	0	0	0	0	0	0.107066	0	0	0	0	0.383877		0	0	0	0	0	0	0	0
Cibicides lobatulus		0	0	0	2.27273	0.133333	0.0552486	0.123457	0.433651	29.6574	0.677436	0.0719942	0	3.3448	1.82342		0	0	0	0	0	0	0	0
Cibicidoides wuellerstorfi		0	0	0.554529	0	0	0.165746	0	0.0867303	0	0	0	0	0.0312598	0		0	0	2.27273	0	0	10.0592	0	0
Cornuspira involvens		0	0	0	0	0	0	0.123457	0	0	0.0521105	0.215983	0	0.0312598	0.287908		0	0	0	0	0	0	0	0
Cornuspira planorbis		0	0	0	0	0.133333	0	2.71605	0.346921	0.642398	0	0	0	0.0312598	0.0959693		0	0	0	0	0	0	0	0
Cornuspira striolatus		0	0	0	0	0	0	0.123457	0	0	0	0	0	0	0		0	0	0	0	0	0	0	0
Dentalina ittai		0	0	0.0924214	0	0	0	0	0	0	0	0	0	0.0312598	0		0	0	0	0	0	0	0	0
Discorbis cf squamata		0	0	0	0	0	0	0.123457	0	0	0.208442	0	0	0.531416	0.0959693		0	0	0	0	0	0	0	0
Discorbis sp.		0	0	0	0	0	0	0	0	0	0.104221	0	0	0	0		0	0	0	0	0	0	0	0
Elphidium clavatum		0	0.492611	16.2662	36.3636	3.73333	21.105	51.2346	47.268	2.89079	12.0896	37.653	26.497	0.844014	1.05566		14.2045	0	1.51515	4.54545	2.14286	2.95858	0	0
Eoeponidella pulchella		0	0	0	0	0	0	0	0.0867303	0	0	0	0	0	0		0	0	0	0	0	0	0	0
Epistominella arctica		1.72414	0	0.924214	1.2987	1.33333	1.98895	4.19753	9.4536	6.95931	17.9781	0	12.2754	15.9737	22.6488		11.9318	0	9.84848	6.06061	7.14286	2.95858	1.40845	1.8018
Epistominella takayanagii		0	0	0	0	0	0	0	0	0	0	0	0	0.125039	0		0	0	0	0	0	0	0	0
Fissurina marginata		0	0.492611	0	0	0	0	0	0	0	0	0	0	0.844014	0		0	0	0	0	0	0	0	0
Fissurina spp		0	0	0	0.324675	0	0	0	0	0.214133	0	0.359971	0	0.0312598	0		0	0	0	0	0	0	0	0
Glabratella arctica		0	0	0	0	0	0	0.123457	0	0	0.0521105	0	0	0.156299	0		0	0	0	0	0	0	0	0
Glomulina oculus		1.72414	0.985222	2.21811	0.649351	1.73333	0.552486	1.85185	0.954033	0.107066	1.09432	6.62347	15.8683	0.844014	0.479846		0	0	0	0	0	0	0	0
Ioanella tumidula		0	0	0	0	0	0	0	0	0	0	0	0	0	0.575816		0	0	0	0	0	0	0	0
Islandiella norcrossi		0	0	0	0.324675	0	0	0	0	0	0	0	0	0	0		0	0	0	0	0	0	0	0
Lagena flatulenta		0	0	0	0	0	0	0	0	0	0	0	0	0	0.0959693		0	0	0	0	0	0	0	0
Lagena mollis		0	0	0	0	0	0	0	0	0	0.0521105	0.647948	0.149701	0	0.0959693		0	0	0	0	0	0	0	0
Lagena sp		0	0	0	0	0	0	0	0	0.107066	0.0521105	0	0	0.0312598	0		0	0	0	0	0	0	0	0
Lagena stelligera		0	0	0	0	0	0	0	0	0.642398	0	0	0	0	0		0	0	0	0	0	0	0	0
Lagena sulcata spicata?		0	0	0	0	0	0	0	0	0.107066	0.0521105	0	0	0	0		0	0	0	0	0	0	0	0
Lenticulina sp.		0	0	0	0	0	0	0	0	0	0	0	0	0.0625195	0		0	0	0	0	0	0	0	0
Melonis barleeanus		0	0	0	0	0.133333	0.220994	0.123457	0.173461	0.321199	0	0	0	0.218818	0.383877		0	0	0	0	0	0	0	1.8018
Miliolidae		0	0	0	0	0	0.0552486	0.617284	0.607112	0	0	0	0	0	0		0	0	0	0	0	0	0	0
Miliolinella chuckchiensis		0	0	0	0	0	0	0	0	0	0	0	0.149701	0	0.191939		0	0	0	0	0	0	0	0
Nonionella iridea		1.72414	21.6749	0.831793	1.94805	13.7333	9.8895	1.35802	1.47441	6.95931	17.8218	8.27934	6.13772	15.7237	13.4357		1.13636	0	5.30303	2.0202	0	1.77515	0	2.7027
Oolina apiopleura		0	0	0	0	0	0	0	0	0	0	0	0	0	0.0959693		0	0	0	0	0	0	0	0
Oolina hexagona		0	0	0	0	0	0	0.123457	0	0	0	0	0	0.156299	0.191939		0	0	0	0	0	0	0	0
Oolina melo		0	0	0	0	0	0	0	0	0.214133	0.156331	0	0	0	0.0959693		0	0	0	0	0	0	0	0
Oolina sp		0	0	0	0	0	0	0	0	0	0	0	0	0.0312598	0		0	0	0	0	0	0	0	0
Oridorsalis umbonatus		0	0	0	0	0	0	0.246914	0.0867303	0	0.104221	0	0	0	0		0	0	0	0.505051	0	0	0	0
Parafissurina arctica		1.72414	0	0	0	0.133333	0.110497	0.37037	0.0867303	0.321199	0.208442	0.719942	0	0.0625195	1.43954		0	0	0	0	0	0	0	0
Parafissurina spp		0	0	0	0.974026	0	0	0	0	0	0.312663	0.791937	0.149701	0.468897	0		0	0	0	0	0	0	0	0
Parafissurina tectulostoma		1.72414	0.492611	0	0	0	0	0	0	0	0.156331	0	0	0	0.287908		0	0	0	0	0	0	0	0
Patellina corrugata		0	0	0	0	0.133333	0	0	0.0867303	0.321199	0.885878	0.0719942	0	1.71929	1.05566		0	0	0	0	0	0	0	0
Pyrgo spp		0	0	0	0.649351	0	0	0	0	0	0	0	0.149701	0	0		0	0	0	0	0	0	0	0
Pyrgoella sphaera		0	0	0	0	0	0	0	0	0.107066	0	0	0	0	0		0	0	0	0	0	0	0	0
Quinqueloculina akneriana		0	0.492611	0.184843	0	0	0.110497	0	0	0	0	0	0	0	0		0	0	4.54545	0	0	0	0	0
Quinqueloculina arctica		0	0	0.184843	0	0	0	0.37037	0.0867303	0	0	0.0719942	0.598802	0.125039	0.0959693		0	0	0.757576	0	0	0	0	0
Quinqueloculina seminulum		0	0	0	0	0	0	0	0	0	0.104221	0	0	0	0.0959693		0	0	0	0	0	0	0	0
Quinqueloculina sp_smooth oblong		0	0	0	0	0	0	0	0	0	0	1.00792	0.898204	0	0		0	0	0	0	0	0	0	0
Robertinoides charlottensis		0	1.47783	0	0	3.73333	0.828729	0	0	0	0.833768	0.431965	0.149701	0.562676	1.05566		0	0	0	0	0	0	0	0
Spirillina spp		0	0	0	0.974026	0.933333	0	0	0.173461	0.321199	0	0.143988	0	0.125039	0.191939		0	0	0	0	0	0	0	0
Stainforthia concava		1.72414	1.47783	0.0924214	0	0.133333	0.220994	0.37037	0.433651	0.535332	0.729547	0.575954	0.149701	0.844014	0.767754		3.97727	0	0	1.0101	0	0.591716	0	0
Stainforthia feylingi		1.72414	0	0	4.22078	0	0	0.123457	0	0.214133	0	0	0	0	0		0	0	0.757576	0	0	0.591716	0	0
Stetsonia horvathi		22.4138	3.44828	24.0296	6.16883	36	36.8508	0.493827	5.29055	4.71092	1.9802	4.31965	5.68862	2.7196	15.1631		0	0	18.1818	0.505051	15.7143	0	0	1.8018
Trifarina fluens		0	0	0	0	0	0	0	0	0.107066	0	0	0	0	0		0	0	0	0	0	0	0	0
Triloculina frigida		0	0	0.277264	0	0	0	0	0.260191	0	0	0	0	0	0		0	0	0	0.505051	0	1.77515	0	0
Triloculina oblonga		0	0.492611	0.0924214	0	0	0	0	0	0	0	0	0	0	0		0	0	0	0	0	0	0	0
Triloculina rotunda		0	0	0	0	0	0	0.246914	0	0.107066	0	0	0.149701	0	0		0	0	0	0	0	0	0	0
Triloculina trihedra		3.44828	0.492611	3.32717	0.324675	0.933333	0.497238	1.60494	1.38768	0	0.521105	0.359971	0.299401	0.0625195	1.63148		0	30	1.51515	0	0	0	0	0
Triloculina trihedra juvenile		1.72414	0	2.49538	0.649351	0.133333	1.27072	0.864198	0.0867303	1.49893	1.40698	1.2239	1.0479	1.65677	0		0	0	0	0	0	0	0	0
Unidentified calcareous		0	0.985222	0.739372	0.974026	0	0	0	0.260191	0.428266	0.260552	0.359971	0.149701	0.0937793	0.287908		0	0	0	0	0	10.0592	0	0
Valvulineria arctica		0	0	0.0924214	0	0	0	0	0	0	0.208442	0.0719942	0	0.0625195	0.863724		0	0	0	0	0	0	0	0
Agglutinated taxa
Adercotryma glomerata		0	0	0.0924214	0	2.13333	0	0.123457	0.433651	1.39186	0.729547	0.143988	0.149701	0.375117	0.0959693		0	1.66667	9.09091	0	10.7143	10.0592	15.493	31.5315
Ammodiscus sp.		0	0	0.184843	0	0	0	0.123457	0	0	0	0	0.149701	0.0625195	0		0	0	0	0	0	0	0	0
Ammoglobigerina globigeriniformis		0	0	0	0	0.533333	0	0	0	0.428266	0.521105	0.215983	0	0.656455	0		0	0	1.51515	0	0	0	0	0
Cribrostomoides jeffreysi		0	0	0	0.649351	0	0	0	0	0	0.260552	0.215983	0	0.187559	0		0	0	0	0	0	0	0	0
Haplophragmoides bradyi		0	0	0	0	0	0	0	0	0.107066	0	0	0	0	0.0959693		0	0	0	0	0	0	0	0
Hormosina globulifera		0	0	0	0	0	0	0	0.260191	0	0	0	0.149701	0	0		0	0	0	0	0	0	0	0
Hyperammina subnodosa		0	0	0.739372	0	0	0.276243	0.37037	0.260191	0	0	0.215983	0	0	0		0	0	0	0	0	0	0	0
Lagenammina difflugiformis		8.62069	0.492611	0	0.974026	0	0.165746	0	0	0	0.260552	0.647948	0	0.0312598	0.191939		0	0	0	0	0	0	0	0
Portatrochammina bipolaris		1.72414	0.492611	1.75601	2.27273	3.2	1.43646	1.48148	2.25499	4.17559	4.4815	4.82361	3.89222	7.93998	2.87908		10.2273	6.66667	3.78788	3.53535	3.57143	2.95858	5.6338	3.6036
Pseudobolivina antarctica		0	0	0.64695	2.27273	0	0.331492	0	0	0.214133	0.156331	0.215983	0	0.218818	0		0	0	0	0	0	0	0	0
Recurvoides turbinatus		0	0	0	0	0.133333	0	0	0	0.749465	0.416884	0.215983	0.449102	1.00031	0.479846		0	0	0	0	0	0	0	0
Reophax bilocularis&subfusiformis		0	0	0	0	0	0	0.246914	0	0	0	0	0	0.0312598	0		0	0	0	1.51515	0	0.591716	0	0
Reophax catenata		3.44828	0	0.0924214	0	0	0.0552486	0	0	0	0	0	0	0	0.0959693		0	0	0	0	0	0	0	0
Reophax dentaliniformis		0	2.95567	0.924214	0	0.133333	0	0	0.607112	0.107066	0.208442	1.15191	0.149701	0.0312598	0.383877		0	1.66667	0	0	0	0	0	0
Reophax guttifera		0	0	0	0	0	0	0	0	0	0	0	0	0.0312598	0		0	0	0	0	0	0	0	0
Reophax pilulifera		0	0	0	0	0	0	0	0	0	0.0521105	0.143988	0	0	0		0	0	0	0	0	0	0	0
Reophax scorpiurus		1.72414	0.492611	3.14233	0	1.73333	0.38674	0	0	0	0	0.647948	0	0	0		10.7955	0	0	0	0	0	0	0
Rhizammina algaeformis		0	11.8227	0	0	0.4	0.0552486	4.07407	1.56114	0	0	0.215983	0	0	0		5.68182	28.3333	0	0	0	0	0	0
Silicosigmoilina groenlandica		0	0	0	0	0	0.38674	0	0	0	0	0	0	0	0		0	0	0	0	0	0	0	0
Spiroplectammina biformis		0	0	0.64695	0.974026	0	0.110497	0	0.0867303	0.107066	0	0.431965	0	0	0.0959693		0	0	0	0	0	0	0	0
Textularia earlandi		13.7931	27.5862	13.586	1.94805	16.2667	3.53591	1.48148	1.47441	0.214133	2.03231	5.39957	4.94012	0.750234	0.575816		20.4545	19.1667	0	30.8081	21.4286	24.2604	56.338	32.4324
Textularia torquata		1.72414	0	0	0.649351	0	0.220994	0	0	0.856531	1.19854	0.431965	0.598802	0.687715	0.287908		0	0	2.27273	0	0	0	0	0
Tritaxis bullata		0	0	0.462107	0	0.933333	0.0552486	0.246914	0.260191	0	0.104221	0.287977	0	0.0625195	0		0	0	0	0	0	0	0	0
Tritaxis cf. atlantica		0	0	0	0	0	0	0	0	0	0	0	0	0.0625195	0		0	0	0	0	0	0	0	0
Trochammina nitida		0	0	0	0	0	0	0	0	0.214133	0.0521105	0.287977	0.299401	0.187559	0		0	0	1.51515	0	0	0	0	0
Trochammina quadriloba		20.6897	8.37438	14.2329	0.649351	5.46667	0.773481	1.48148	2.25499	0.642398	0.416884	1.58387	0.299401	0.562676	0.479846		7.38636	10	0.757576	3.53535	2.85714	4.14201	21.1268	10.8108
Trochammina spp		0	0	0	0.324675	0.133333	0	0	0	0	0	0	0	0	0.0959693		0	0	0	0	0	0	0	0
Trochammina squamata		0	0.492611	0	0	0	0	0	0.0867303	0	0	0.0719942	0	0.0312598	0		0	0	0	0	0	0	0	0
Unidentified agglutinated		0	0	0	0.324675	0	0	0	0.0867303	0.107066	0.0521105	0.215983	0	0.0625195	0		0	0	0	0	0	1.18343	0	0
Percentages of living taxa in total assemblages
Calcareous taxa
Astrononion gallowayi		0	0	0	0	0	0	0	0	0	0	0	0	0	0		0	0	0	0	0	0	0	0
Bolivina arctica		0	0	0	0	0	0	0	0.0868056	0.106952	0	0	0	0	0		0	0	0	0	0	0	0	0
Brizalina pseudopunctata		0	0	0	0	0	0	0	0	0	0	0	0	0	0		0	0	0	0	0	0	0	0
Buccella frigida		1.72414	0	0	2.27273	0.533333	0.0552486	0	0	0.106952	0	0	0	0	0		8.52273	0	0	0	0	0	0	0
Buliminella elegantissima		0	0	0.370028	0	0.133333	0	0	0	0	0.625326	0.143988	1.49701	0.218818	0		0	0	0	0	0	0	0	0
Cassidulina neoteretis		0	0	1.85014	6.16883	0.133333	3.48066	0	1.73611	0.427807	0.885878	3.02376	1.49701	0	1.53551		5.11364	0	0	0	0	0	0	0
Cassidulina reniforme		0	0	0.370028	0.974026	0	3.20442	0	0.0868056	0.213904	0.208442	0.791937	0.299401	0	0		0.568182	0	0	0	0	0	0	0
Ceratobulimina arctica		3.44828	0	5.92044	0	0	0.441989	0	0.173611	0.106952	0.208442	2.80778	0.748503	0.0625195	0		0	0	0	0	0	0	0	0
Chilostomella elongata		0	0	0.0925069	0	0	0	0	0	0	0	0	0	0	0		0	0	0	0	0	0	0	0
Cibicides lobatulus		0	0	0	0	0	0.0552486	0	0	0.106952	0	0.0719942	0	0	0		0	0	0	0	0	0	0	0
Cibicidoides wuellerstorfi		0	0	0.555042	0	0	0.110497	0	0.0868056	0	0	0	0	0	0		0	0	0	0	0	0	0	0
Cornuspira involvens		0	0	0	0	0	0	0	0	0	0	0.0719942	0	0.0312598	0		0	0	0	0	0	0	0	0
Cornuspira planorbis		0	0	0	0	0	0	0	0.0868056	0	0	0	0	0.0312598	0		0	0	0	0	0	0	0	0
Cornuspira striolatus		0	0	0	0	0	0	0	0	0	0	0	0	0	0		0	0	0	0	0	0	0	0
Dentalina ittai		0	0	0.0925069	0	0	0	0	0	0	0	0	0	0.0312598	0		0	0	0	0	0	0	0	0
Discorbis cf squamata		0	0	0	0	0	0	0	0	0	0	0	0	0	0		0	0	0	0	0	0	0	0
Discorbis sp.		0	0	0	0	0	0	0	0	0	0	0	0	0	0		0	0	0	0	0	0	0	0
Elphidium clavatum		0	0	10.2683	29.8701	2.66667	17.9558	0	23.1771	0	0.781657	20.2304	16.9162	0	0		14.2045	0	0	0	0	0	0	0
Eoeponidella pulchella		0	0	0	0	0	0	0	0	0	0	0	0	0	0		0	0	0	0	0	0	0	0
Epistominella arctica		0	0	0.185014	0.974026	0.133333	0.38674	0	0.173611	0.641711	0	0	2.09581	0.437637	1.2476		11.9318	0	0	0	0	0	0	0
Epistominella takayanagii		0	0	0	0	0	0	0	0	0	0	0	0	0	0		0	0	0	0	0	0	0	0
Fissurina marginata		0	0	0	0	0	0	0	0	0	0	0	0	0	0		0	0	0	0	0	0	0	0
Fissurina spp		0	0	0	0	0	0	0	0	0	0	0.215983	0	0	0		0	0	0	0	0	0	0	0
Glabratella arctica		0	0	0	0	0	0	0	0	0	0	0	0	0	0		0	0	0	0	0	0	0	0
Glomulina oculus		0	0	1.11008	0	1.6	0	0	0.260417	0	0.0521105	4.17567	1.49701	0.0625195	0		0	0	0	0	0	0	0	0
Ioanella tumidula		0	0	0	0	0	0	0	0	0	0	0	0	0	0.0959693		0	0	0	0	0	0	0	0
Islandiella norcrossi		0	0	0	0	0	0	0	0	0	0	0	0	0	0		0	0	0	0	0	0	0	0
Lagena flatulenta		0	0	0	0	0	0	0	0	0	0	0	0	0	0		0	0	0	0	0	0	0	0
Lagena mollis		0	0	0	0	0	0	0	0	0	0	0.215983	0	0	0		0	0	0	0	0	0	0	0
Lagena sp		0	0	0	0	0	0	0	0	0	0	0	0	0	0		0	0	0	0	0	0	0	0
Lagena stelligera		0	0	0	0	0	0	0	0	0	0	0	0	0	0		0	0	0	0	0	0	0	0
Lagena sulcata spicata?		0	0	0	0	0	0	0	0	0	0	0	0	0	0		0	0	0	0	0	0	0	0
Lenticulina sp.		0	0	0	0	0	0	0	0	0	0	0	0	0	0		0	0	0	0	0	0	0	0
Melonis barleeanus		0	0	0	0	0	0.220994	0	0.0868056	0.106952	0	0	0	0	0		0	0	0	0	0	0	0	0
Miliolidae		0	0	0	0	0	0	0	0	0	0	0	0	0	0		0	0	0	0	0	0	0	0
Miliolinella chuckchiensis		0	0	0	0	0	0	0	0	0	0	0	0	0	0		0	0	0	0	0	0	0	0
Nonionella iridea		0	0	0.740056	0	1.86667	2.32044	0	0	0.427807	0.625326	4.82361	2.54491	0.531416	0.767754		1.13636	0	0	0	0	0	0	0
Oolina apiopleura		0	0	0	0	0	0	0	0	0	0	0	0	0	0		0	0	0	0	0	0	0	0
Oolina hexagona		0	0	0	0	0	0	0	0	0	0	0	0	0	0		0	0	0	0	0	0	0	0
Oolina melo		0	0	0	0	0	0	0	0	0	0	0	0	0	0		0	0	0	0	0	0	0	0
Oolina sp		0	0	0	0	0	0	0	0	0	0	0	0	0	0		0	0	0	0	0	0	0	0
Oridorsalis umbonatus		0	0	0	0	0	0	0	0	0	0.0521105	0	0	0	0		0	0	0	0	0	0	0	0
Parafissurina arctica		1.72414	0	0	0	0	0.0552486	0	0.0868056	0	0.0521105	0.143988	0	0	0.0959693		0	0	0	0	0	0	0	0
Parafissurina spp		0	0	0	0	0	0	0	0	0	0.0521105	0.215983	0	0.250078	0		0	0	0	0	0	0	0	0
Parafissurina tectulostoma		0	0	0	0	0	0	0	0	0	0	0	0	0	0.0959693		0	0	0	0	0	0	0	0
Patellina corrugata		0	0	0	0	0	0	0	0	0	0	0	0	0.0625195	0		0	0	0	0	0	0	0	0
Pyrgo spp		0	0	0	0.649351	0	0	0	0	0	0	0	0	0	0		0	0	0	0	0	0	0	0
Pyrgoella sphaera		0	0	0	0	0	0	0	0	0	0	0	0	0	0		0	0	0	0	0	0	0	0
Quinqueloculina akneriana		0	0	0.0925069	0	0	0	0	0	0	0	0	0	0	0		0	0	0	0	0	0	0	0
Quinqueloculina arctica		0	0	0	0	0	0	0	0	0	0	0	0.299401	0.125039	0		0	0	0	0	0	0	0	0
Quinqueloculina seminulum		0	0	0	0	0	0	0	0	0	0.104221	0	0	0	0		0	0	0	0	0	0	0	0
Quinqueloculina sp_smooth oblong		0	0	0	0	0	0	0	0	0	0	0.0719942	0.149701	0	0		0	0	0	0	0	0	0	0
Robertinoides charlottensis		0	0	0	0	0	0.0552486	0	0	0	0.104221	0.0719942	0	0	0.0959693		0	0	0	0	0	0	0	0
Spirillina spp		0	0	0	0.324675	0.133333	0	0	0.0868056	0.106952	0	0.0719942	0	0	0.191939		0	0	0	0	0	0	0	0
Stainforthia concava		0	0.492611	0	0	0	0	0	0	0	0.156331	0.143988	0	0.0312598	0		3.97727	0	0	0	0	0	0	0
Stainforthia feylingi		0	0	0	2.5974	0	0	0	0	0	0	0	0	0	0		0	0	0	0	0	0	0	0
Stetsonia horvathi		3.44828	0	18.4089	3.8961	3.06667	2.87293	0	0.173611	0.213904	0.573215	1.79986	0.748503	0.0937793	0.0959693		0	0	0	0	0	0	0	0
Trifarina fluens		0	0	0	0	0	0	0	0	0	0	0	0	0	0		0	0	0	0	0	0	0	0
Triloculina frigida		0	0	0	0	0	0	0	0.0868056	0	0	0	0	0	0		0	0	0	0	0	0	0	0
Triloculina oblonga		0	0	0	0	0	0	0	0	0	0	0	0	0	0		0	0	0	0	0	0	0	0
Triloculina rotunda		0	0	0	0	0	0	0	0	0	0	0	0	0	0		0	0	0	0	0	0	0	0
Triloculina trihedra		0	0	0.370028	0	0.133333	0.0552486	0	0.0868056	0	0.208442	0	0	0	0		0	0	0	0	0	0	0	0
Triloculina trihedra juvenile		0	0	0.555042	0	0.133333	0.110497	0	0	0	0	0	0	0.0312598	0		0
Unidentified calcareous		0	0	0	0	0	0	0	0	0	0	0.0719942	0	0	0		0	0	0	0	0	0	0	0
Valvulineria arctica		0	0	0	0	0	0	0	0	0	0	0	0	0	0		0	0	0	0	0	0	0	0
Agglutinated taxa
Adercotryma glomerata		0	0	0.0925069	0	0.666667	0	0	0.260417	0	0.104221	0.0719942	0	0.0937793	0		0	0	0	0	0	0	0	0
Ammodiscus sp.		0	0	0.185014	0	0	0	0	0	0	0	0	0	0.0312598	0		0	0	0	0	0	0	0	0
Ammoglobigerina globigeriniformis		0	0	0	0	0.266667	0	0	0	0.106952	0.260552	0	0	0.0937793	0		0	0	0	0	0	0	0	0
Cribrostomoides jeffreysi		0	0	0	0	0	0	0	0	0	0.0521105	0.0719942	0	0	0		0	0	0	0	0	0	0	0
Haplophragmoides bradyi		0	0	0	0	0	0	0	0	0	0	0	0	0	0.0959693		0	0	0	0	0	0	0	0
Hormosina globulifera		0	0	0	0	0	0	0	0	0	0	0	0.149701	0	0		0	0	0	0	0	0	0	0
Hyperammina subnodosa		0	0	0.0925069	0	0	0	0	0.0868056	0	0	0	0	0	0		0	0	0	0	0	0	0	0
Lagenammina difflugiformis		0	0.492611	0	0.974026	0	0.110497	0	0	0	0.104221	0.287977	0	0	0.191939		0	0	0	0	0	0	0	0
Portatrochammina bipolaris		1.72414	0	1.11008	1.2987	1.33333	0.828729	0	1.82292	2.13904	0.625326	2.66379	2.84431	0.593936	2.30326		10.2273	0	0	0	0	0	0	0
Pseudobolivina antarctica		0	0	0	0	0	0	0	0	0.106952	0.0521105	0	0	0.0937793	0		0	0	0	0	0	0	0	0
Recurvoides turbinatus		0	0	0	0	0.133333	0	0	0	0.320856	0.0521105	0.215983	0.449102	0.0937793	0.479846		0	0	0	0	0	0	0	0
Reophax bilocularis&subfusiformis		0	0	0	0	0	0	0	0	0	0	0	0	0	0		0	0	0	0	0	0	0	0
Reophax catenata		0	0	0	0	0	0	0	0	0	0	0	0	0	0		0	0	0	0	0	0	0	0
Reophax dentaliniformis		0	1.47783	0.555042	0	0	0	0	0.260417	0	0	0.50396	0	0	0.191939		0	0	0	0	0	0	0	0
Reophax guttifera		0	0	0	0	0	0	0	0	0	0	0	0	0	0		0	0	0	0	0	0	0	0
Reophax pilulifera		0	0	0	0	0	0	0	0	0	0	0.143988	0	0	0		0	0	0	0	0	0	0	0
Reophax scorpiurus		0	0	1.57262	0	0.133333	0.220994	0	0	0	0	0.359971	0	0	0		10.7955	0	0	0	0	0	0	0
Rhizammina algaeformis		0	5.41872	0	0	0	0	0	0.347222	0	0	0.215983	0	0	0		5.68182	0	0	0	0	0	0	0
Silicosigmoilina groenlandica		0	0	0	0	0	0.220994	0	0	0	0	0	0	0	0		0	0	0	0	0	0	0	0
Spiroplectammina biformis		0	0	0.277521	0.324675	0	0.0552486	0	0.0868056	0	0	0.143988	0	0	0.0959693		0	0	0	0	0	0	0	0
Textularia earlandi		6.89655	0.492611	8.97317	1.62338	0.666667	0.662983	0	0.0868056	0	0.104221	2.23182	1.0479	0.187559	0.287908		20.4545	0	0	0	0	0	0	0
Textularia torquata		0	0	0	0.324675	0	0	0	0	0.427807	0.104221	0.143988	0.149701	0.0312598	0.0959693		0	0	0	0	0	0	0	0
Tritaxis bullata		0	0	0.277521	0	0	0.0552486	0	0	0	0.0521105	0.143988	0	0	0		0	0	0	0	0	0	0	0
Tritaxis cf. atlantica		0	0	0	0	0	0	0	0	0	0	0	0	0	0		0	0	0	0	0	0	0	0
Trochammina nitida		0	0	0	0	0	0	0	0	0	0	0	0	0	0		0	0	0	0	0	0	0	0
Trochammina quadriloba		12.069	3.94089	10.6383	0.324675	2.13333	0.607735	0	0.173611	0.106952	0	1.15191	0.149701	0.156299	0.287908		7.38636	0	0	0	0	0	0	0
Trochammina spp		0	0	0	0.324675	0.133333	0	0	0	0	0	0	0	0	0.0959693		0	0	0	0	0	0	0	0
Trochammina squamata		0	0	0	0	0	0	0	0	0	0	0	0	0	0		0	0	0	0	0	0	0	0
Unidentified agglutinated		0	0	0	0	0	0	0	0.0868056	0	0	0.143988	0	0.0312598	0		0	0	0	0	0	0	0	0
